# Supplementary material for: Activation of mitochondrial TRAP1 stimulates mitochondria-lysosome crosstalk and correction of lysosomal dysfunction
Source: PubMed Central journal article supplement — iScience. 2022 Aug 14;25(9):104941. doi: 10.1016/j.isci.2022.104941 (PMC9440283; doi:10.1016/j.isci.2022.104941), 2022-08-14
Supplement: mmc1.pdf [file mmc1.pdf]

**Supplemental information**

**Activation of mitochondrial TRAP1**

**stimulates mitochondria-lysosome**

**crosstalk and correction of lysosomal dysfunction**

**Fannie W. Chen, Joanna P. Davies, Raul Calvo, Jagruti Chaudhari, Georgia Dolios, Mercedes K. Taylor, Samarjit Patnaik, Jean Dehdashti, Rebecca Mull, Patricia Dranchack, Amy Wang, Xin Xu, Emma Hughes, Noel Southall, Marc Ferrer, Rong Wang, Juan J. Marugan, and Yiannis A. Ioannou**

## Supplemental Information

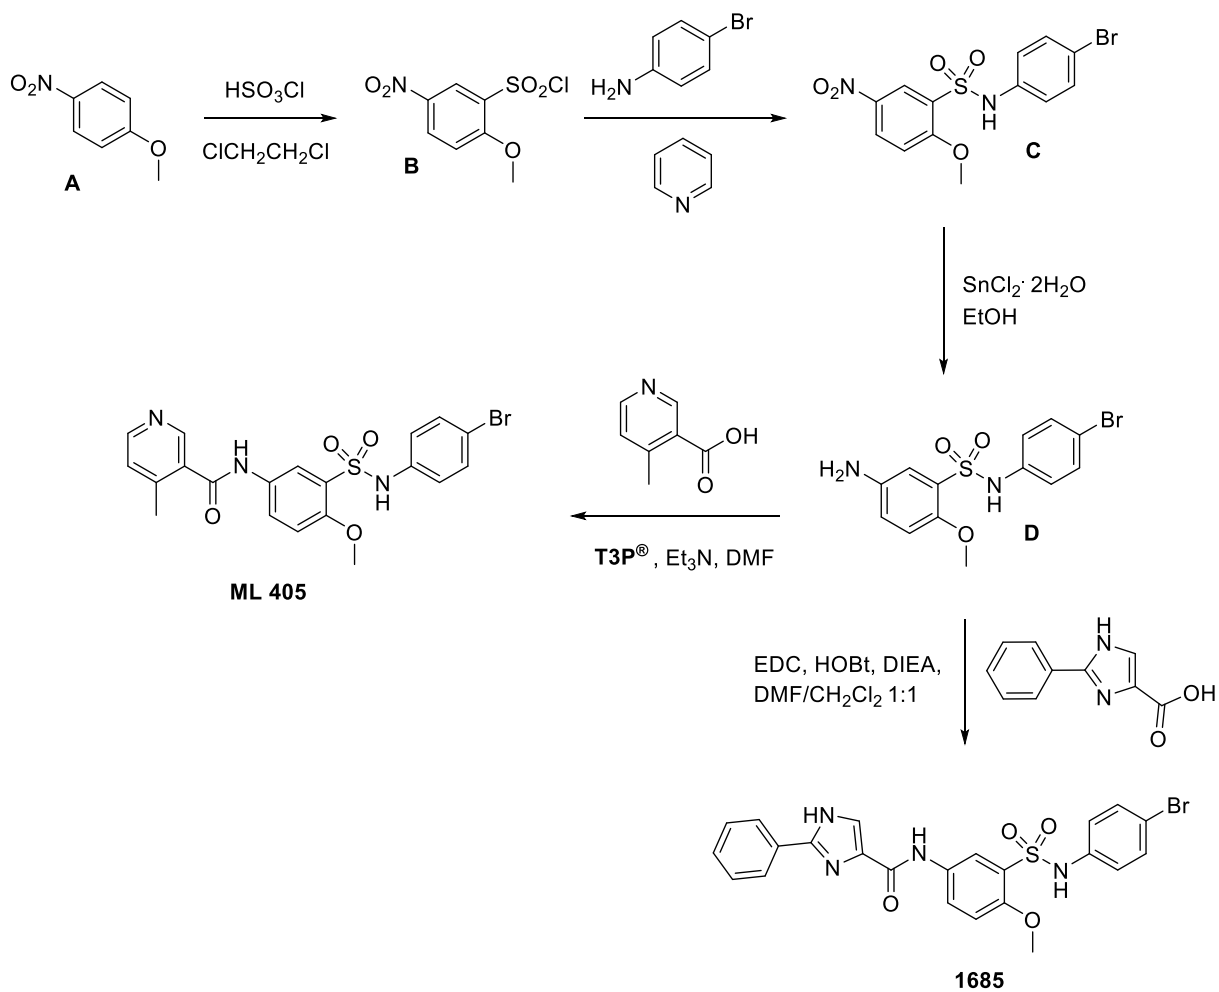

**T3P**<sup>®</sup> = 2,4,6-tripropyl-1,3,5,2,4,6-trioxatriphosphinane 2,4,6-trioxide

**Figure S1. Scheme for synthesis of lead compounds, related to STAR Methods.**

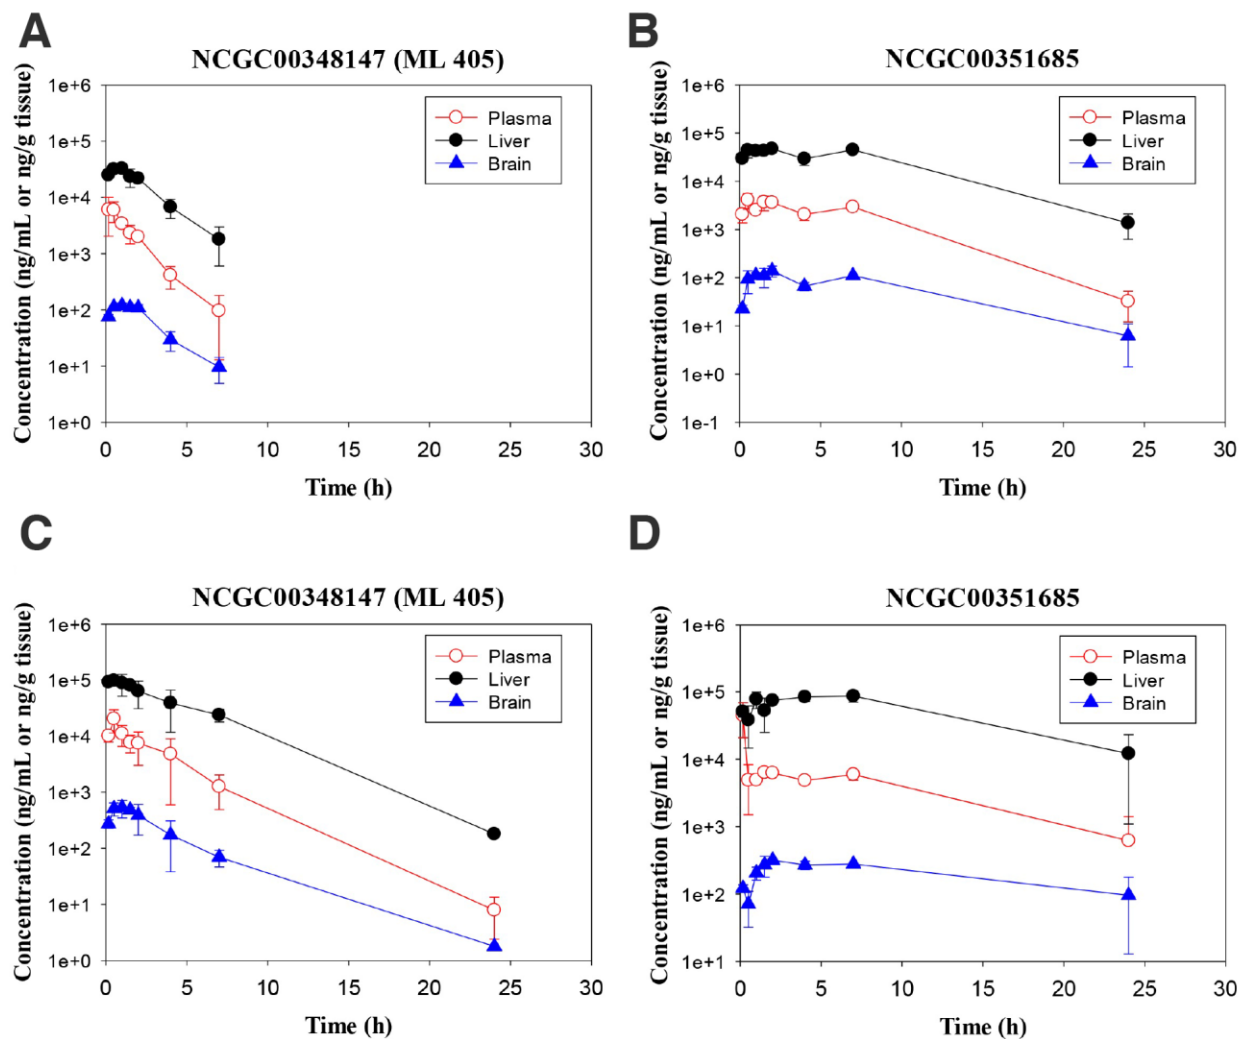

**Figure S2. Pharmacokinetic profiles of NCGC00348147 (ML 405) and NCGC00351685 (1685) in C57BL/6 mice, related to Figure 1A. (A-B)** Following single IP injection at 10 mg/kg, systemic exposures measured by  $C_{max}$  and  $AUC_{0-\infty}$  were 6050 ng/mL and 9980 ng<sup>\*</sup>h/mL for ML405, and 4100 ng/mL and 44500 ng.h/mL for 1685, respectively. The higher AUC observed for 1685 may be due to slower elimination, as the  $t_{1/2}$  of 1685 was ca. 2.5-fold longer (i.e., 3.2 hr for 1685 vs 1.3 hr for ML405). **(C-D)** As the dose increased to 30 mg/kg, in vivo exposures increased with the dose with a longer  $t_{1/2}$  for both compounds (see also Table S1). Values are expressed as mean  $\pm$  SEM ( $n=3$  for each sampling time point).

| Test Article                 | NCGC00348147 (ML405) |       |       |        |       |        |
|------------------------------|----------------------|-------|-------|--------|-------|--------|
| Sample                       | Plasma               | Brain | Liver | Plasma | Brain | Liver  |
| Dose (mg/kg)                 | 10                   | 10    | 10    | 30     | 30    | 30     |
| AUC <sub>0-t</sub> (ng*h/mL) | 9790                 | 368   | 87000 | 54000  | 2410  | 559000 |
| AUC <sub>0-∞</sub> (ng*h/mL) | 9980                 | 391   | 91100 | 54000  | 2420  | 560000 |
| t <sub>1/2</sub> (h)         | 1.3                  | 1.7   | 1.6   | 2.2    | 3.1   | 2.5    |
| T <sub>max</sub> (h)         | 0.167                | 1     | 1     | 0.5    | 1     | 0.5    |
| C <sub>max</sub> (ng/mL)     | 6050                 | 119   | 32800 | 20200  | 531   | 97200  |
| AUC ratio (tissue/plasma)    |                      | 0.04  | 7.4   |        | 0.03  | 6.8    |

| Test Article                 | NCGC00351685 (1685) |       |        |        |       |         |
|------------------------------|---------------------|-------|--------|--------|-------|---------|
| Sample                       | Plasma              | Brain | Liver  | Plasma | Brain | Liver   |
| Dose (mg/kg)                 | 10                  | 10    | 10     | 30     | 30    | 30      |
| AUC <sub>0-t</sub> (h*ng/mL) | 44400               | 1650  | 659000 | 103000 | 4960  | 1360000 |
| AUC <sub>0-∞</sub> (h*ng/mL) | 44500               | 1700  | 667000 | 109000 | ND    | ND      |
| t <sub>1/2</sub> (h)         | 3.2                 | 5.1   | 4.1    | 5      | ND    | ND      |
| T <sub>max</sub> (h)         | 0.5                 | 2     | 2      | 0.167  | 2     | 7       |
| C <sub>max</sub> (ng/mL)     | 4100                | 138   | 46800  | 44700  | 317   | 86000   |
| AUC ratio (tissue/plasma)    |                     | 0.04  | 15     |        | 0.05  | 13      |

ND = Not determined because the elimination phase was not fully captured in the tissue

**Table S1. Pharmacokinetics of ML405 and 1685 in plasma, brain and liver of Male C57Bl6 Mice after Single IP Administration, related to Figure 1A.** The liver to plasma AUC ratios were about 7 and 14 for ML405 and 1685, respectively. The brain AUC of ML405 and 1685 was ~ 4% of plasma AUC values, which indicated that both compounds had low brain penetration.
